# Supplementary material
Source: publisher figshare collection journal article supplement (https://tandf.figshare.com/articles/dataset/_/12081732)
Supplement: Supplementary file 1 [file 2]

List:

1. Data for Example 2: dermatitis.sas7bdat
2. SAS codes for Example 1: SBR_Example_1_Ophthalmology_Table3Results.sas
3. SAS codes for Example 2: SBR_Example_2_Dermatitis_Table4Results.sas
4. Spread sheet calculation for Example 1: SBR_Example_1_Ophthalmology_Table3Results.xlsx
5. Spread sheet calculation for Example 2: SBR_Example_2_Dermatitis_Table4Results.xlsx
6. SAS macros: NParCov4.sas
